# Supplementary material
Source: ML conference proceedings conference paper supplement (https://proceedings.neurips.cc/paper_files/paper/2010/hash/470e7a4f017a5476afb7eeb3f8b96f9b-Abstract.html)
Supplement: Supplementary file 1 [file 470e7a4f017a5476afb7eeb3f8b96f9b-Supplemental.zip]

Archive with 1 entries (1 files):
- extra/NIPS2010_0757_extra.pdf
