# Supplementary material
Source: ML conference proceedings conference paper supplement (https://proceedings.neurips.cc/paper_files/paper/2010/hash/470e7a4f017a5476afb7eeb3f8b96f9b-Abstract.html)
Supplement: Supplementary file 1 [file 470e7a4f017a5476afb7eeb3f8b96f9b-Supplemental.zip › extra/NIPS2010_0757_extra.pdf]

---

# Hashing Hyperplane Queries to Near Points with Applications to Large-Scale Active Learning Supplementary Material

---

**Prateek Jain**  
Algorithms Research Group  
Microsoft Research, Bangalore, India  
prajain@microsoft.com

**Sudheendra Vijayanarasimhan**  
Department of Computer Science  
University of Texas at Austin  
svnaras@cs.utexas.edu

**Kristen Grauman**  
Department of Computer Science  
University of Texas at Austin  
grauman@cs.utexas.edu

## Appendix A: Proof of LSH for Hyperplane Hashing

We first recall the data-structure used for LSH. We store  $l$ -hash tables and every hash table contains  $k$ -bit hash keys. So, the  $s$ -th hash table has a corresponding function  $g_s : \mathbb{R}^d \rightarrow \{0, 1\}^k$  that given a vector, maps the vector to  $k$ -bit hash keys. Each function  $g_s$  is obtained by randomly sampling  $\mathcal{H}$  with replacement:  $g_s = (h_{s_1}, h_{s_2}, \dots, h_{s_k})$ .

Here, we show that using locality-sensitive hash functions for the distance  $d_\theta(\cdot, \cdot)$  along with hash tables, we can get a  $(1 + \epsilon)$ -approximate solution to our hyperplane-to-point search problem in sub-linear time.

In particular, we prove the following theorem:

**Theorem 0.1.** *Let  $\mathcal{H}$  be a family of  $(r, r(1 + \epsilon), p_1, p_2)$ -locality hash functions (see Definition 3.1 (Main Text)), with  $p_1 > p_2$ . Now given a database of  $N$  points, we set  $k = \log_{1/p_2} N$  and  $l = N^\rho$ , where  $\rho = \frac{\log p_1}{\log p_2}$ . Now using  $\mathcal{H}$  along with  $l$ -hash tables over  $k$ -bits, given a hyperplane query  $w$ , with probability at least  $\frac{1}{2} - \frac{1}{e}$ , the algorithm solves the  $(r, \epsilon)$ -neighbor problem, i.e., if there exists a point  $x$  s.t.  $d_\theta(x, w) \leq (1 + \epsilon)r$ , then the algorithm will return the point with probability  $\geq 1/2 - 1/e$ . The retrieval time is bounded by  $O(N^\rho)$ .*

*Proof.* Our proof is a simple adaption of the proof of Theorem 1, Gionis et al. [1]. We present it here for the sake of completeness.

Following [1] we prove two properties:

**P1:** Let  $x^*$  be a point such that  $d_\theta(x^*, w) \leq r$ , then  $g_j(x^*) = g_j(w)$  for some  $1 \leq j \leq l$  with probability  $1/2 - 1/e$ .

**Proof:** Now we know that

$$\Pr[g_j(x^*) = g_j(w)] \geq p_1^k = p_1^{\log_{1/p_2} N} = N^{-\rho}.$$

Hence,

$$\Pr[g_j(x^*) \neq g_j(w), \forall j] = \prod_j \Pr[g_j(x^*) \neq g_j(w)] \leq (1 - N^{-\rho})^l = (1 - N^{-\rho})^{N^\rho} \leq 1/e.$$

Thus, P1 holds with probability  $> 1 - 1/e$ .

**P2:** Consider the set  $S = \{y \text{ s.t., } d_\theta(y, w) > r(1 + \epsilon) \text{ and } g_j(y) = g_j(w) \text{ for some } j\}$ . Then  $|S| \leq cl$  with probability at least  $1 - 1/c$ .

**Proof:** Now if  $d_\theta(\mathbf{y}, \mathbf{w}) > r(1 + \epsilon)$ , then  $\Pr[h(\mathbf{y}) = h(\mathbf{w})] \leq p_2$ . Hence, for any  $j$ ,

$$\Pr[g_j(\mathbf{y}) = g_j(\mathbf{w})] \leq p_2^k = p_2^{\log_{1/p_2} n} = 1/N.$$

Thus the expected number of collisions for a single  $j$  is  $N \cdot \Pr[g_j(\mathbf{y}) = g_j(\mathbf{w})] = 1$  and hence  $E[|S|] = l$ . Therefore, by Markov's inequality:

$$\Pr(|S| > cl) \leq 1/c.$$

Hence, P2 holds with probability  $> 1 - 1/c$ .

The theorem now immediately follows from P1 and P2, as by P1 we are assured of retrieving the point  $\mathbf{x}^*$  with probability  $> 1/2 - 1/e$ , and by P2 we are assured of not looking at more than  $cl = O(N^\rho)$  points.  $\square$

## Appendix B: Comparison of approximation guarantees

In this section we compare the bounds on retrieval for both of our hashing methods. To recall, our H-Hash method guarantees the  $(1 + \epsilon)$ -approximate solution in time  $N^\rho$ , where  $\rho \leq \frac{1 - \log(1 - \frac{4r}{\pi^2})}{1 + \frac{\epsilon}{\frac{\pi^2}{4r}} \log 4}$ .

Similarly, our EH-Hash method guarantees the  $(1 + \epsilon)$ -approximate solution in time  $N^\rho$ , where  $\rho \leq \frac{\log \cos^{-1} \sin^2(\sqrt{r}) - \log \pi}{\log \cos^{-1} \sin^2(\sqrt{r}(1 + \epsilon/2)) - \log \pi}$ . Note that the function  $\cos^{-1} \sin^2(\sqrt{r})$  behaves similarly to  $\frac{1}{2} - \frac{2r}{\pi^2}$ , which is twice the probability of collision for our H-Hash method when the points are within distance  $r$  (see Figure 1). This indicates that the bounds for our EH-Hash method should be significantly stronger than the corresponding bounds for our H-Hash method.

Figure 2 compares the values of  $\rho$  obtained by our two methods for different values of  $\epsilon$ . We can clearly see that for our EH-Hash method the value of  $\rho$  is always smaller than the corresponding value for H-Hash method. Now, we give a concrete example. Let  $\epsilon = 3.5$ . Then it can be easily computed that if the closest point to the hyperplane is at angle of around  $5^\circ$ , then H-Hash will return a point within  $9^\circ$  in time  $N^{0.97}$  while the corresponding bound for EH-Hash method will be  $N^{0.89}$ , a significant gain.

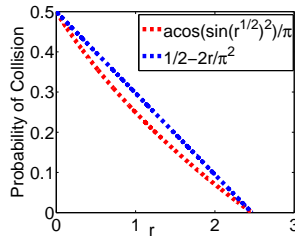

Figure 1: Comparison of the probability of collision  $p_1$  for our EH-Hash method with the function  $f(r) = \frac{1}{2} - \frac{2r}{\pi^2}$

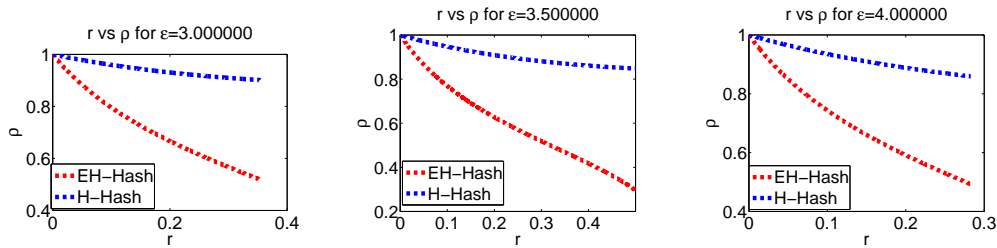

Figure 2: Comparison of the values of  $\rho$  for our H-Hash and EH-Hash methods with different values of  $\epsilon = \{3.0, 3.5, 4.0\}$

## Appendix C: Randomized Sampling

*Proof of Lemma 3.4.* Let  $i_k$  denote the randomly sampled index (using probability distribution  $p$  defined in the lemma) at the  $k$ -th round, i.e.,  $i_k$  is index  $j$  with probability  $p_j$ . Next, we define a random variable  $G_k$  as,

$$G_k = v_{i_k} y_{i_k} / p_{i_k}.$$

Note that,

$$E[G_k] = \sum_j p_j v_j y_j / p_j = \mathbf{v}^T \mathbf{y}, \quad (1)$$

$$Var(G_k) = \sum_j p_j (v_j y_j / p_j)^2 - (\mathbf{v}^T \mathbf{y})^2 \leq \frac{v_j^2 t_j^2}{t_j^2 / \|\mathbf{y}\|^2} = \|\mathbf{v}\|^2 \|\mathbf{y}\|^2 = 1. \quad (2)$$

$$(3)$$

Now, our final approximation for  $\mathbf{v}^T \mathbf{y}$  is obtained by averaging random variables  $G_k$ , i.e.,

$$\tilde{\mathbf{v}}^T \mathbf{x} = \frac{1}{t} \sum_k G_k.$$

Now, using Bernstein's inequality:

$$\Pr(|\sum_{k=1}^t (G_k - \mathbf{v}^T \mathbf{y})| \geq t\epsilon) < \exp(-t\epsilon^2).$$

Hence, if we select  $t = \frac{c}{\epsilon^2}$ , then with probability at least  $1 - \log(1/c)$ ,

$$|\tilde{\mathbf{v}}^T \mathbf{y} - \mathbf{v}^T \mathbf{y}| \leq \epsilon.$$

□

## References

- [1] A. Gionis, P. Indyk, and R. Motwani. Similarity Search in High Dimensions via Hashing. In *Proceedings of the 25th Intl Conf. on Very Large Data Bases*, 1999.
